# Supplementary material for: Genetic Diversity and Population Structure of the USDA Sweetpotato (Ipomoea batatas) Germplasm Collections Using GBSpoly
Source: Front Plant Sci. 2018 Aug 21;9:1166. doi: 10.3389/fpls.2018.01166 (PMC6111789; doi:10.3389/fpls.2018.01166)
Supplement: TABLE S1 — Information of Ipomoea batatas accessions analyzed by GBSpoly. [file Table_1.XLSX]

## Sheet: Sheet1
USVL Code	Accession	Common Name	Country	Regional Group	Cluster NJ Tree	Indivdiual Color NJ Tree	Structure ID	Population Assignment q-value >0.65	Subjective Periderm (Skin) Color	Subjective Stele (Flesh)Color	Dry Weight (%)
G026	PI 308196	2	New Zealand	Pacific Islands	North American-1	Red	106	2	Brown	Yellow/Orange	20.5
G595	PI 629269	7	Papua New Guinea	Pacific Islands	Pacific Islands	Red	292	1	Purple/Red	White	28.4
G102	PI 531103	13	Peru	South America	African	Green	161	A	Red	Yellow/Orange	28.9
G027	PI 308198	19	New Zealand	Pacific Islands	North American-1	Red	107	A	Brown	Cream	32.6
G041	PI 320446	46	New Zealand	Pacific Islands	Pacific Islands	Red	119	1	Brown	Cream	27
G068	PI 508515	60	China	Far East	Far East	Orange	141	1	Purple/Red	Cream	36.6
G434	PI 585095	115	Peru	South America	South American	Green	248	3	Cream	Cream	24.9
G104	PI 531105	117	Peru	South America	South American	Green	162	3	Brown	Cream	29.2
G106	PI 531108	121	Peru	South America	South American	Green	163	A	Brown	White	33
G107	PI 531109	124	Peru	South America	South American	Green	164	A	.	.	.
G108	PI 531110	132	Peru	South America	Pacific Islands	Green	165	A	Red	Orange	25.6
G110	PI 531112	149	Peru	South America	Far East	Green	166	1	Red	Cream	24.4
G042	PI 320448	153	New Zealand	Pacific Islands	Pacific Islands	Red	120	1	Purple/Red	White	30
G111	PI 531113	159	Peru	South America	South American	Green	167	3	Red	Cream	38.3
G112	PI 531114	168	Peru	South America	North American-1	Green	168	2	Red	Orange	28.6
G032	PI 315343	170	Philippines	Far East	Far East	Orange	111	A	Brown	Yellow/Orange	22.8
G113	PI 531115	173	Peru	South America	South American	Green	169	3	Brown	Cream	29
G070	PI 508517	205	China	Far East	Far East	Orange	143	2	Cream	Yellow/Orange	31.4
G071	PI 508518	224	China	Far East	Far East	Orange	144	A	Purple/Red	Cream	32
G043	PI 324885	255	Papua New Guinea	Pacific Islands	Far East	Red	121	1	Cream	Cream	25.9
G033	PI 315347	295	Papua New Guinea	Pacific Islands	Pacific Islands	Red	112	1	Red	Yellow/Orange	23
G094	PI 531094	392	Guatemala	Central America	Caribbean/Central American	Blue	155	1	Purple/Red	Cream	26.4
G431	PI 585092	393	Guatemala	Central America	Caribbean/Central American	Blue	247	1	Purple/Red	Purple/Cream	38.1
G028	PI 308200	459	New Zealand	Pacific Islands	South American	Red	108	A	Brown	White	25.9
G016	PI 208796	469	Puerto Rico	Caribbean	North American-1	Purple	97	2	Red	Orange	25.2
G029	PI 308201	500	New Zealand	Pacific Islands	Far East	Red	109	2	Brown	Yellow/Orange	27.3
G184	PI 538306	529	Guatemala	Central America	North American-1	Blue	184	2	Brown	Orange	25.6
G185	PI 538307	540	Guatemala	Central America	Caribbean/Central American	Blue	185	1	Red	Cream	29.6
G421	PI 585081	573	Guatemala	Central America	Pacific Islands	Blue	238	1	Cream	White	31.5
G186	PI 538308	618	Guatemala	Central America	Caribbean/Central American	Blue	186	1	Purple/Red	Yellow/Orange	28
G100	PI 531101	624	Guatemala	Central America	Caribbean/Central American	Blue	159	1	Cream	Cream	24.9
G423	PI 585083	625	Guatemala	Central America	Far East	Blue	239	1	Purple/Red	Cream	30.3
G187	PI 538309	633	Guatemala	Central America	Caribbean/Central American	Blue	187	1	Purple/Red	Cream	32.6
G430	PI 585091	2788	Venezuela	South America	Caribbean/Central American	Green	246	1	Brown	Cream	30.7
G101	PI 531102	8520	Costa Rica	Central America	South American	Blue	160	3	Cream	Yellow/Orange	29.8
G019	PI 267946	"None"	Mexico	Central America	Far East	Blue	99	2	Brown	Yellow/Orange	30.5
G054	PI 376946	"None"	Guatemala	Central America	Far East	Blue	128	1	Purple/Red	Cream	28.5
G624	PI 633988	"Unknown"	Columbia	South America	South American	Green	309	3	Brown	Cream	36.7
G601	PI 629275	4A-6	Papua New Guinea	Pacific Islands	Far East	Red	295	1	Cream	Cream	35.7
G602	PI 629276	6B-1	Papua New Guinea	Pacific Islands	Pacific Islands	Red	296	1	Cream	Cream	34.3
G067	PI 508514	74-637	China	Far East	Far East	Orange	140	1	Cream	White	33.1
G069	PI 508516	78-2	China	Far East	African	Orange	142	A	Red	Yellow/Orange	29.3
G722	PI 634462	81-52	United States	North America	North American-2-2	Turquoise	380	A	Brown	Orange	22.4
G256	PI 564122	83003-12	Tonga	Pacific Islands	Pacific Islands	Red	200	1	Cream	Cream	30.5
G257	PI 564123	83005-19	Tonga	Pacific Islands	Pacific Islands	Red	201	1	Purple/Red	Cream	26.1
G416	PI 585076	87036-102	Tonga	Pacific Islands	Far East	Red	236	A	Cream	Cream	36.1
G429	PI 585090	9 Blanca Americana	Puerto Rico	Caribbean	Caribbean/Central American	Purple	245	A	Brown	White	28.2
G626	PI 634366	AC 76.12	Uruguay	South America	South American	Green	311	A	Cream	Cream	31.6
G627	PI 634367	AC 83.4-2	Nigeria	Africa	North American-1	Pink	312	2	Brown	Yellow/Orange	32
G628	PI 634368	AC 83.5-2	Nigeria	Africa	African	Pink	313	A	Brown	Cream	30.8
G001	Grif 995	AC 83.5-7	Nigeria	Africa	North American-1	Pink	89	2	Red	Cream	28.7
G265	PI 564131	ACC 213	Solomon Islands	Pacific Islands	Pacific Islands	Red	207	1	Purple/Red	White	25.7
G263	PI 564129	ACC 309	Solomon Islands	Pacific Islands	Pacific Islands	Red	206	1	Cream	Yellow/Orange	33.5
G754	PI 641933	Agena	United States	North America	Far East	Turquoise	382	1	White	Purple/Cream	.
G199	PI 538353	Amanecer	Puerto Rico	Caribbean	Pacific Islands	Purple	197	A	Red	Cream	25.1
G180	PI 538301	Amarillo de Trujillo	Peru	South America	South American	Green	180	3	Cream	Cream	33.6
G276	PI 564143	Amasonto	Papua New Guinea	Pacific Islands	Far East	Red	214	1	Red	Cream	29.3
G567	PI 612688	Anaranjado Inte	Peru	South America	South American	Green	270	3	Cream	Yellow/Orange	27.1
G020	PI 286619	Ang 16	New Zealand	Pacific Islands	Far East	Red	100	2	Brown	Yellow/Orange	34.3
G615	PI 633964	AVRDC-CN 1732-4	Taiwan	Far East	South American	Orange	303	3	Red	Cream	21.1
G604	PI 633441	Ayui	Uruguay	South America	North American-2-2	Green	298	A	Brown	Orange	20.9
G303	PI 566614	B-18	Canada	North America	North American-1	Turquoise	225	A	Red	Orange	28.8
G018	PI 208886	B-6369	Puerto Rico	Caribbean	North American-1	Purple	98	2	Red	Orange	24.7
G629	PI 634369	B-6708	United States	North America	South American	Turquoise	314	3	Brown	Cream	34.3
G301	PI 566612	Baker	United States	North America	North American-1	Turquoise	223	2	Red	Yellow/Orange	27.3
G002	Grif 1004	Banana Yam	United States	North America	North American-1	Turquoise	90	2	Cream	Cream	30.8
G424	PI 585085	Baracutey	Mexico	Central America	Caribbean/Central American	Blue	240	A	Purple/Red	Cream	32.4
G086	PI 508534	Batata morada	Venezuela	South America	Caribbean/Central American	Green	153	1	Purple/Red	Purple/Orange	26.1
Bayou_Belle	Bayou Belle	Bayou Belle	United States	North America	North American-2-2	Turquoise	85	A	Purple/Red	Orange	.
G302	PI 566613	Beauregard	United States	North America	North American-1	Turquoise	224	2	Red	Orange	21.4
G592	PI 620764	Belastiqui	Uruguay	South America	North American-2-2	Green	290	A	Purple/Red	Cream	30.3
Bellevue	Bellevue	Bellevue	United States	North America	North American-2-2	Turquoise	86	2	Brown	Orange	.
G630	PI 634370	Bengal	United States	North America	North American-1	Turquoise	315	A	Brown	Orange	24.2
G024	PI 296116	BNAS 51	Philippines	Far East	African	Orange	104	A	Purple/Red	Cream	26.1
G288	PI 564156	BNAS-1	Philippines	Far East	Pacific Islands	Orange	218	1	Cream	Cream	32.9
Bonita	Bonita	Bonita	United States	North America	North American-2-2	Turquoise	87	A	Cream	Cream	23.2
G195	PI 538349	Bugsbunny	Puerto Rico	Caribbean	North American-2-1	Purple	193	A	Brown	Orange	24.7
G758	PI 645581	Bunch Porto Rico	United States	North America	North American-1	Turquoise	386	2	Brown	Yellow/Orange	30.1
Burgundy	Burgundy	Burgundy	United States	North America	North American-2-2	Turquoise	88	A	Red	Orange	.
G015	PI 208029	Camaguey	Cuba	Caribbean	Caribbean/Central American	Purple	96	A	Red	Orange	27
G076	PI 508523	Camote amarillo	Guatemala	Central America	South American	Blue	148	A	Brown	Yellow	35.5
G417	PI 585077	Camote Amarillo	Guatemala	Central America	Far East	Blue	237	A	Cream	Cream	25.2
G056	PI 399163	Camote Morado	Guatemala	Central America	Caribbean/Central American	Blue	130	1	Purple/Red	Purple/Cream	39.7
G057	PI 399164	Camote Morado	Guatemala	Central America	Far East	Blue	131	1	Red	Cream	26.8
G093	PI 531093	Camote morado	Guatemala	Central America	Caribbean/Central American	Blue	154	1	Purple/Red	Purple/Cream	34.6
G096	PI 531096	Camote morado	Guatemala	Central America	Caribbean/Central American	Blue	156	1	Purple/Red	Cream	24.2
G097	PI 531097	Camote morado	Guatemala	Central America	Caribbean/Central American	Blue	157	1	Purple/Red	Cream	38.1
G098	PI 531098	Camote morado	Guatemala	Central America	South American	Blue	158	A	Purple/Red	Cream	35
G570	PI 612691	Camote Tallo	Peru	South America	South American	Green	273	3	Brown	Cream	30.9
G569	PI 612690	Camote Yuca	Peru	South America	Pacific Islands	Green	272	A	Cream	Cream	34.4
G117	PI 531119	Canchari	Peru	South America	North American-1	Green	173	3	Brown	Orange	26.5
G711	PI 634451	Carolina Bunch	United States	North America	North American-2-2	Turquoise	370	A	Brown	Orange	23.4
G765	PI 566616	Carolina Nugget	United States	North America	North American-1	Turquoise	388	A	Red	Orange	28.9
G593	PI 628761	Carolina Ruby	United States	North America	North American-2-2	Turquoise	291	A	Red	Orange	23.8
G625	PI 633989	Cascajo Morado	Peru	South America	Far East	Green	310	A	Cream	Purple/Cream	45.1
G307	PI 566619	Centennial	United States	North America	North American-1	Turquoise	226	2	Brown	Orange	23.3
G183	PI 538305	Chinchano	Peru	South America	Far East	Green	183	1	Red	Cream	29.5
G535	PI 606263	Chuanshu 27	China	Far East	Far East	Orange	259	A	Red	Purple/Orange	31.3
G123	PI 531125	Chuquimanco	Peru	South America	South American	Green	177	3	Cream	Yellow/Orange	26.6
G568	PI 612689	CIP 420024	Peru	South America	South American	Green	271	1	Cream	Cream	37.3
G022	PI 286623	CLPR 9A	New Zealand	Pacific Islands	Far East	Red	102	2	Brown	Orange	30.3
G614	PI 633963	CN 1424-9	Taiwan	Far East	Far East	Orange	302	A	Red	Orange	25.7
G579	PI 612700	CN 1448-49	Taiwan	Far East	Far East	Orange	280	1	Purple/Red	Cream	29.6
G428	PI 585089	CN 1448-59	Taiwan	Far East	Far East	Orange	244	1	Brown	Yellow/Orange	32.1
G254	PI 564120	CN 1510-25	Taiwan	Far East	Far East	Orange	198	A	Red	Cream	30.1
G494	PI 599370	CN 1525-11	Taiwan	Far East	Far East	Orange	251	1	Cream	Cream	29
G581	PI 612702	CN 1747-88	Taiwan	Far East	Far East	Orange	282	A	Cream	Yellow/Orange	28.8
G309	PI 566622	Cordner	United States	North America	North American-1	Turquoise	227	2	Red	Orange	25.4
G572	PI 612693	Costeno	Peru	South America	South American	Green	275	3	Purple/Red	Yellow	36.7
G631	PI 634371	Creole	United States	North America	North American-1	Turquoise	316	2	Brown	Cream	29.6
G492	PI 599368	Cuba 2	Cuba	Caribbean	Caribbean/Central American	Purple	249	A	Cream	Cream	26.7
G034	PI 315349	Daxua	Solomon Islands	Pacific Islands	Far East	Red	113	A	Cream	Cream	34.2
G632	PI 634372	Dooley	United States	North America	Far East	Turquoise	317	1	Purple/Red	Cream	26
G633	PI 634373	Easter	United States	North America	Pacific Islands	Turquoise	318	1	Brown	Orange	22.1
G310	PI 566624	Eureka	United States	North America	North American-1	Turquoise	228	2	Red	Orange	27.6
G311	PI 566625	Excel	United States	North America	North American-2-2	Turquoise	229	A	Brown	Orange	24
G052	PI 376944	Extranjero	Guatemala	Central America	Far East	Blue	126	1	.	.	.
G196	PI 538350	Francia	Puerto Rico	Caribbean	Pacific Islands	Purple	194	1	Cream	Cream	28.4
G635	PI 634375	GA-122	United States	North America	Pacific Islands	Turquoise	319	1	Red	Purple/Cream	35.9
G582	PI 612703	GA90-16	United States	North America	Pacific Islands	Turquoise	283	1	Brown	Cream	26.4
G516	PI 599392	Gaozi 1	China	Far East	Far East	Orange	255	1	Red	Cream	28.8
G636	PI 634376	Garnet	United States	North America	North American-1	Turquoise	320	A	Purple/Red	Orange	28.4
G081	PI 508528	Gem	United States	North America	North American-1	Turquoise	150	2	Red	Orange	28.2
G312	PI 566627	Georgia Jet	United States	North America	North American-2-1	Turquoise	230	A	Red	Orange	23.4
G637	PI 634377	Gold Jewel	United States	North America	North American-1	Turquoise	321	2	Brown	Orange	26.5
G638	PI 634378	Golden Belle	United States	North America	Far East	Turquoise	322	2	Cream	Orange	25
G584	PI 614795	Guangshu 7	China	Far East	African	Orange	285	A	Brown	White	27.5
G065	PI 508511	H	Australia	Australia	North American-2-1	Yellow	138	A	Cream	Cream	32.9
G493	PI 599369	Haiti	Cuba	Caribbean	Caribbean/Central American	Purple	250	A	Purple/Red	Cream	29.7
Hatteras	Hatteras	Hatteras	United States	North America	North American-2-3	Turquoise	392	A	Brown	Orange	.
G639	PI 634379	Hayman	United States	North America	North American-1	Turquoise	323	2	Red	Orange	23.5
G640	PI 634380	Hayman White	United States	North America	North American-1	Turquoise	324	2	Brown	Cream	30
G575	PI 612696	Helena	Peru	South America	South American	Green	276	3	.	.	.
Hernandez	Hernandez	Hernandez	United States	North America	North American-1	Turquoise	393	2	Red	Orange	19.7
G317	PI 566633	HiDry	United States	North America	Far East	Turquoise	231	A	Cream	Cream	39.2
G643	PI 634383	HM-145	United States	North America	Far East	Turquoise	326	A	Cream	Cream	30
G642	PI 634382	HM-16	United States	North America	North American-1	Turquoise	325	A	Purple/Red	Yellow/Orange	29.6
G557	PI 612678	Honghong 1	China	Far East	Far East	Orange	263	1	Purple/Red	White	32.6
G064	PI 508510	Hongmi	Korea	Far East	South American	Orange	137	3	Brown	Orange	23.7
G318	PI 566634	Hopi	United States	North America	North American-1	Turquoise	232	2	Red	Orange	24.8
G258	PI 564124	IB01	Samoa	Pacific Islands	North American-1	Red	202	2	Brown	Orange	28.5
G259	PI 564125	IB05	Samoa	Pacific Islands	Far East	Red	203	1	Red	Cream	30.2
G260	PI 564126	IB13	Samoa	Pacific Islands	Far East	Red	204	A	Red	Cream	24.5
G261	PI 564127	IB14	Samoa	Pacific Islands	African	Red	205	A	Red	Cream	26.8
G119	PI 531121	Ihuanco	Peru	South America	North American-1	Green	175	2	Red	White	31.1
G620	PI 633984	IITA-TIS 83/1038	Nigeria	Africa	Far East	Pink	306	1	.	.	.
G319	PI 566636	Jasper	United States	North America	North American-2-1	Turquoise	233	A	Purple/Red	Cream	25.2
G120	PI 531122	Jewel	United States	North America	Far East	Turquoise	176	A	Red	Orange	24.7
G511	PI 599387	Jonathan	Peru	South America	South American	Green	253	3	Brown	Orange	26.9
G036	PI 318848	Kamula Belep	New Caledonia	Pacific Islands	Far East	Red	115	2	Cream	Yellow/Orange	24.8
G021	PI 286621	Kanifuta	New Zealand	Pacific Islands	Far East	Red	101	A	Brown	Yellow/Orange	29.6
G062	PI 508508	Kogane-sengan	Japan	Far East	Far East	Orange	135	1	Cream	Cream	38.2
G060	PI 508506	Koto-puki	Japan	Far East	Far East	Orange	133	A	Purple/Red	Cream	32.1
G051	PI 344140	Kumara Enua	Cook Islands	Pacific Islands	South American	Red	125	3	Brown	White	22.2
G426	PI 585087	Kyukei 97	Japan	Far East	Far East	Orange	242	A	Purple/Red	Cream	32
G616	PI 633965	Kyukei No. 63	Japan	Far East	Far East	Orange	304	1	Red	Cream	41.6
G611	PI 633448	Kyushu No.100	Japan	Far East	North American-2-1	Orange	301	A	Red	Orange	23.7
G272	PI 564138	L 116	Papua New Guinea	Pacific Islands	Pacific Islands	Red	212	1	.	.	.
G268	PI 564134	L 13	Papua New Guinea	Pacific Islands	North American-1	Red	209	2	Brown	Orange	27.3
G273	PI 564139	L 135	Papua New Guinea	Pacific Islands	Pacific Islands	Red	213	1	Cream	Yellow/Orange	27.9
G269	PI 564135	L 18	Papua New Guinea	Pacific Islands	North American-1	Red	210	2	Red	Orange	31.5
G266	PI 564132	L 3	Papua New Guinea	Pacific Islands	Pacific Islands	Red	208	1	Cream	Cream	27.6
G271	PI 564137	L 46	Papua New Guinea	Pacific Islands	Pacific Islands	Red	211	1	Purple/Red	White	26.3
G010	Grif 12500	L 86-33	United States	North America	North American-1	Turquoise	91	A	Red	Orange	21.8
G646	PI 634386	LA 54-89	United States	North America	South American	Turquoise	327	A	Red	Orange	26.7
G049	PI 344124	Lakwaw	Philippines	Far East	Far East	Orange	124	2	Brown	Orange	29.7
G512	PI 599388	Liaoshu 40	China	Far East	South American	Orange	254	3	Red	Cream	26
G564	PI 612685	LM 87.045	Peru	South America	Far East	Green	269	1	Red	Cream	.
G605	PI 633442	Los Cerrillas	Uruguay	South America	North American-2-2	Green	299	A	Purple/Red	Orange	24.9
G191	PI 538345	Macana	Puerto Rico	Caribbean	African	Purple	190	A	Red	Cream	28.8
G580	PI 612701	Man Lobor	Thailand	Far East	Far East	Orange	281	1	Cream	Orange	27.9
G293	PI 564161	Margarita	Puerto Rico	Caribbean	North American-1	Purple	220	A	Purple/Red	Yellow/Orange	24
G536	PI 606264	Maria Angola	Peru	South America	South American	Green	260	A	Purple/Red	Cream	27.9
G282	PI 564149	Markham	Papua New Guinea	Pacific Islands	Pacific Islands	Red	216	1	Cream	Cream	36.2
G285	PI 564153	Mbakoka	Papua New Guinea	Pacific Islands	Far East	Red	217	1	Purple/Red	White	33.8
G723	PI 634463	MD 7-93	United States	North America	North American-2-1	Turquoise	381	A	Red	Orange	24.7
G757	PI 642848	Merenge	United States	North America	Far East	Turquoise	385	1	Red	White	32.3
G080	PI 508527	Miguela arecibo-22	Puerto Rico	Caribbean	Caribbean/Central American	Purple	149	A	Red	Cream	35.1
G082	PI 508529	Miguela-24	Puerto Rico	Caribbean	Caribbean/Central American	Purple	151	A	.	.	.
G197	PI 538351	Mojave	Puerto Rico	Caribbean	Caribbean/Central American	Purple	195	A	Purple/Red	Cream	29
G755	PI 641934	Molokai Purple	United States	North America	Far East	Turquoise	383	1	Purple/Red	Purple/Cream	32.7
G084	PI 508531	Morada, Sombica	Venezuela	South America	Caribbean/Central American	Green	152	1	Cream	White	30.6
G053	PI 376945	Morado	Guatemala	Central America	Far East	Blue	127	1	Purple/Red	Cream	30.6
G181	PI 538302	Morado de Calango T-1	Peru	South America	South American	Green	181	3	Brown	Orange	25.5
G182	PI 538303	Morado de Chillon	Peru	South America	South American	Green	182	3	Brown	Orange	23
G025	PI 304088	Morado-de-Yucatan	Mexico	Central America	Far East	Blue	105	1	Purple/Red	Cream	28.7
G035	PI 318846	N.Z. 196 (613)	Indonesia	Far East	North American-2-1	Orange	114	A	Brown	Yellow/Orange	35.7
G047	PI 344122	N.Z. 25 (0 15)	China	Far East	Far East	Orange	122	1	Purple/Red	Cream	35.2
G037	PI 318855	N.Z. 642 (LI 1)	New Zealand	Pacific Islands	Far East	Red	116	2	Brown	Yellow/Orange	24.4
G039	PI 318858	N.Z. 654 (07)	New Zealand	Pacific Islands	Caribbean/Central American	Red	117	A	Cream	White	26.6
G040	PI 318859	N.Z. 657 (J 2)	New Zealand	Pacific Islands	Pacific Islands	Red	118	1	Purple/Red	White	28.7
00_099	USDA00-099	N/A	United States	North America	North American-2-2	Turquoise	1	A	Red	White	26
02_015	USDA02-015	N/A	United States	North America	North American-2-3	Turquoise	2	4	Red	Orange	22.2
02_126	USDA02-126	N/A	United States	North America	North American-2-3	Turquoise	3	4	Red	Orange	26.1
02_415	USDA02-415	N/A	United States	North America	North American-2-3	Turquoise	4	4	Red	Cream	27.4
04_136	USDA04-136	N/A	United States	North America	North American-2-3	Turquoise	5	A	Red	Orange	17.7
04_284	USDA04-284	N/A	United States	North America	North American-2-3	Turquoise	6	A	.	.	30.1
04_531NC	USDA04-531NC	N/A	United States	North America	North American-2-3	Turquoise	7	4	Red	Orange	21.4
04_538	USDA04-538	N/A	United States	North America	North American-2-3	Turquoise	8	4	Red	Orange	19.7
04_671	USDA04-671	N/A	United States	North America	North American-2-3	Turquoise	9	4	Red	Orange	24.9
04_791	USDA04-791	N/A	United States	North America	North American-2-3	Turquoise	10	4	Purple/Red	Orange	22
05_097	USDA05-097	N/A	United States	North America	North American-2-3	Turquoise	11	4	Purple/Red	Yellow/Orange	19.7
06_001	USDA06-001	N/A	United States	North America	North American-2-1	Turquoise	12	A	Brown	Orange	17.7
06_312NC	USDA06-312NC	N/A	United States	North America	North American-2-3	Turquoise	13	4	Brown	Yellow	.
07_117	USDA07-117	N/A	United States	North America	North American-2-3	Turquoise	14	4	Purple/Red	Orange	22.5
07_119	USDA07-119	N/A	United States	North America	North American-2-3	Turquoise	15	4	Purple/Red	Orange	18.7
07_135	USDA07-135	N/A	United States	North America	North American-2-3	Turquoise	16	A	Purple/Red	Orange	17.8
07_182	USDA07-182	N/A	United States	North America	North American-2-3	Turquoise	17	4	Red	Orange	21
07_189	USDA07-189	N/A	United States	North America	North American-2-1	Turquoise	18	4	.	.	21.9
07_519NC	USDA07-519NC	N/A	United States	North America	North American-2-3	Turquoise	19	4	Brown	Yellow/Orange	19.6
08_213	USDA08-213	N/A	United States	North America	North American-2-3	Turquoise	20	4	Brown	Orange	.
08_249	USDA08-249	N/A	United States	North America	North American-2-3	Turquoise	21	4	.	.	19
08_270	USDA08-270	N/A	United States	North America	North American-2-3	Turquoise	22	4	Red	Orange	23.8
08_345	USDA08-345	N/A	United States	North America	North American-2-3	Turquoise	23	4	Purple/Red	Orange	31.4
08_390	USDA08-390	N/A	United States	North America	North American-2-3	Turquoise	24	4	Red	Cream	29.4
08_779NC	USDA08-779NC	N/A	United States	North America	North American-2-3	Turquoise	25	4	Red	Yellow/Orange	20
09_050	USDA09-050	N/A	United States	North America	North American-2-3	Turquoise	26	4	Brown	Orange	20.5
09_083	USDA09-083	N/A	United States	North America	North American-2-3	Turquoise	27	4	Red	Cream	21.4
09_130	USDA09-130	N/A	United States	North America	North American-2-3	Turquoise	28	A	Brown	Orange	22.1
09_1321NC	USDA09-1321NC	N/A	United States	North America	Far East	Turquoise	29	1	.	.	25.6
09_1363NC	USDA09-1363NC	N/A	United States	North America	North American-2-3	Turquoise	30	4	Brown	Cream	23.4
09_1397NC	USDA09-1397NC	N/A	United States	North America	North American-2-3	Turquoise	31	4	.	.	20.6
10_024	USDA10-024	N/A	United States	North America	North American-2-2	Turquoise	32	A	Purple/Red	Yellow/Orange	25
10_053	USDA10-053	N/A	United States	North America	North American-2-3	Turquoise	33	4	Purple/Red	Yellow/Orange	16.9
10_060	USDA10-060	N/A	United States	North America	North American-2-3	Turquoise	34	4	Brown	Orange	18.8
10_066NC	USDA10-066NC	N/A	United States	North America	North American-2-3	Turquoise	35	A	Red	Cream	20.6
10_073	USDA10-073	N/A	United States	North America	North American-2-3	Turquoise	36	4	Brown	Orange	.
10_077	USDA10-077	N/A	United States	North America	North American-2-3	Turquoise	37	4	Brown	Orange	26.8
10_087	USDA10-087	N/A	United States	North America	North American-2-3	Turquoise	38	4	Purple/Red	Orange	22.7
10_100	USDA10-100	N/A	United States	North America	North American-2-3	Turquoise	39	4	Purple/Red	Orange	20.8
10_102	USDA10-102	N/A	United States	North America	North American-2-3	Turquoise	40	4	Purple/Red	Orange	21.9
10_126	USDA10-126	N/A	United States	North America	North American-2-2	Turquoise	41	A	Purple/Red	Orange	18.5
10_147	USDA10-147	N/A	United States	North America	North American-2-3	Turquoise	42	4	Purple/Red	Orange	20.5
10_162	USDA10-162	N/A	United States	North America	North American-2-3	Turquoise	43	4	Purple/Red	Orange	17.5
10_185	USDA10-185	N/A	United States	North America	North American-2-3	Turquoise	44	4	Purple/Red	White	29
10_186	USDA10-186	N/A	United States	North America	North American-2-3	Turquoise	45	A	Purple/Red	Yellow/Orange	33
10_671NC	USDA10-671NC	N/A	United States	North America	North American-2-3	Turquoise	46	4	Purple/Red	White	25.6
10_673NC	USDA10-673NC	N/A	United States	North America	North American-2-3	Turquoise	47	4	Purple/Red	Cream	26.2
10_677	USDA10-677	N/A	United States	North America	North American-2-3	Turquoise	48	4	Purple/Red	Yellow	.
10_680NC	USDA10-680NC	N/A	United States	North America	North American-2-3	Turquoise	49	4	.	.	.
10_681NC	USDA10-681NC	N/A	United States	North America	North American-2-3	Turquoise	50	4	Red	Orange	26.4
10_684NC	USDA10-684NC	N/A	United States	North America	North American-2-3	Turquoise	51	4	Purple/Red	Orange	18.8
10_710NC	USDA10-710NC	N/A	United States	North America	North American-2-3	Turquoise	52	A	Purple/Red	Orange	19.7
10_714NC	USDA10-714NC	N/A	United States	North America	North American-2-3	Turquoise	53	A	Brown	Orange	21.5
10_717NC	USDA10-717NC	N/A	United States	North America	North American-2-3	Turquoise	54	A	Red	Orange	16.2
10_719NC	USDA10-719NC	N/A	United States	North America	North American-2-3	Turquoise	55	A	Brown	Orange	18.1
10_721NC	USDA10-721NC	N/A	United States	North America	North American-2-3	Turquoise	56	A	Purple/Red	Orange	22.3
10_722NC	USDA10-722NC	N/A	United States	North America	North American-2-3	Turquoise	57	4	Brown	Orange	15.9
11_004	USDA11-004	N/A	United States	North America	North American-2-3	Turquoise	58	4	Red	Orange	24.5
11_008	USDA11-008	N/A	United States	North America	North American-2-2	Turquoise	59	A	Red	Orange	21.4
11_011	USDA11-011	N/A	United States	North America	North American-2-3	Turquoise	60	4	Red	Yellow/Orange	20.2
11_018	USDA11-018	N/A	United States	North America	North American-2-3	Turquoise	61	4	Purple/Red	Cream	26
11_020	USDA11-020	N/A	United States	North America	North American-2-3	Turquoise	62	4	Red	Orange	17.1
11_021	USDA11-021	N/A	United States	North America	North American-2-3	Turquoise	63	4	Purple/Red	Orange	22.2
11_022	USDA11-022	N/A	United States	North America	North American-2-2	Turquoise	64	A	Purple/Red	White	25.6
11_024	USDA11-024	N/A	United States	North America	North American-2-2	Turquoise	65	A	Purple/Red	Yellow/Orange	30.3
11_028	USDA11-028	N/A	United States	North America	North American-2-3	Turquoise	66	4	Purple/Red	Yellow/Orange	24
11_032	USDA11-032	N/A	United States	North America	North American-2-3	Turquoise	67	4	Purple/Red	Orange	24.7
11_034	USDA11-034	N/A	United States	North America	North American-2-3	Turquoise	68	4	Purple/Red	Yellow/Orange	34.6
11_042	USDA11-042	N/A	United States	North America	North American-2-3	Turquoise	69	4	Brown	Orange	16.6
11_045	USDA11-045	N/A	United States	North America	North American-2-2	Turquoise	70	A	Red	Orange	20.1
11_046	USDA11-046	N/A	United States	North America	North American-2-2	Turquoise	71	A	Purple/Red	Yellow/Orange	21.4
11_055	USDA11-055	N/A	United States	North America	North American-2-3	Turquoise	72	A	Purple/Red	White	29.5
11_059	USDA11-059	N/A	United States	North America	North American-2-2	Turquoise	73	A	Purple/Red	Cream	26.1
11_067	USDA11-067	N/A	United States	North America	North American-2-3	Turquoise	74	4	Purple/Red	Cream	27.8
11_069	USDA11-069	N/A	United States	North America	North American-2-3	Turquoise	75	4	Purple/Red	White	24.6
11_079	USDA11-079	N/A	United States	North America	North American-2-3	Turquoise	76	4	Purple/Red	White	27.6
11_080	USDA11-080	N/A	United States	North America	North American-2-3	Turquoise	77	4	Purple/Red	White	24.9
11_089	USDA11-089	N/A	United States	North America	North American-2-3	Turquoise	78	4	Purple/Red	Yellow/Orange	23.9
11_090	USDA11-090	N/A	United States	North America	North American-1	Turquoise	79	2	Purple/Red	Orange	19.8
11_094	USDA11-094	N/A	United States	North America	North American-2-3	Turquoise	80	4	Purple/Red	Orange	20.4
11_096	USDA11-096	N/A	United States	North America	North American-2-3	Turquoise	81	4	Purple/Red	Orange	15.6
11_100	USDA11-100	N/A	United States	North America	North American-2-3	Turquoise	82	4	Purple/Red	Yellow/Orange	25.6
95_145	USDA95-145	N/A	United States	North America	North American-2-3	Turquoise	83	4	Red	White	30.4
97_095	USDA97-095	N/A	United States	North America	North American-2-3	Turquoise	84	4	Purple/Red	White	26.4
NC05_198	NC05-198	N/A	United States	North America	North American-2-2	Turquoise	394	2	Red	Orange	.
NC07_847	NC07-847	N/A	United States	North America	North American-2-3	Turquoise	395	A	Brown	Yellow	.
W258	USDA-W258	N/A	United States	North America	North American-1	Turquoise	400	2	Brown	Orange	18.2
W259	USDA-W259	N/A	United States	North America	North American-2-3	Turquoise	401	4	Red	Yellow/Orange	.
W261	USDA-W261	N/A	United States	North America	North American-2-1	Turquoise	402	A	Brown	Orange	.
W273	USDA-W273	N/A	United States	North America	North American-2-1	Turquoise	403	A	Brown	Orange	19.5
W274	USDA-W274	N/A	United States	North America	North American-2-3	Turquoise	404	4	Brown	Yellow/Orange	25.1
W315	USDA-W315	N/A	United States	North America	North American-2-3	Turquoise	405	A	Brown	Cream	31.1
W328	USDA-W328	N/A	United States	North America	North American-2-3	Turquoise	406	4	Brown	Orange	26.1
W353	USDA-W353	N/A	United States	North America	North American-2-1	Turquoise	407	A	Red	Orange	20.4
W364	USDA-W364	N/A	United States	North America	North American-2-2	Turquoise	408	A	Purple/Red	White	31.5
W372	USDA-W372	N/A	United States	North America	North American-2-3	Turquoise	409	4	Brown	Yellow/Orange	21
W376	USDA-W376	N/A	United States	North America	North American-2-3	Turquoise	410	4	Brown	Orange	23.3
W381	USDA-W381	N/A	United States	North America	North American-2-3	Turquoise	411	A	Brown	Orange	19.1
W382	USDA-W382	N/A	United States	North America	North American-2-2	Turquoise	412	4	Purple/Red	Orange	23.9
W383	USDA-W383	N/A	United States	North America	North American-1	Turquoise	413	2	Brown	Orange	21
W384	USDA-W384	N/A	United States	North America	North American-2-3	Turquoise	414	4	Red	Orange	26.5
W385	USDA-W385	N/A	United States	North America	North American-2-3	Turquoise	415	4	Red	Orange	21.8
W388	USDA-W388	N/A	United States	North America	North American-2-3	Turquoise	416	4	Purple/Red	White	30.2
W393	USDA-W393	N/A	United States	North America	North American-2-2	Turquoise	417	A	Purple/Red	Orange	26.9
G048	PI 344123	Nanyo	Japan	Far East	Far East	Orange	123	1	Purple/Red	Cream	29.3
G652	PI 634392	NC 1327	United States	North America	North American-1	Turquoise	329	A	Red	Orange	27.4
G577	PI 612698	NC 262	United States	North America	North American	Turquoise	278	A	Cream	Cream	22.9
G651	PI 634391	NC 718	United States	North America	North American-1	Turquoise	328	A	Red	Orange	26.9
G116	PI 531118	Nemanete	Peru	South America	South American	Green	172	A	Red	Yellow/Orange	28.7
G597	PI 629271	NG 4A3	Papua New Guinea	Pacific Islands	Pacific Islands	Red	294	A	Brown	Orange	27.9
G596	PI 629270	NGLU 6-1	Papua New Guinea	Pacific Islands	Far East	Red	293	1	.	.	.
G606	PI 633443	NN31	Vietnam	Far East	South American	Orange	300	3	Purple/Red	Cream	37.7
G063	PI 508509	Norin 2	Japan	Far East	Far East	Orange	136	1	Cream	White	34.8
G012	PI 153905	Norin No.2	Japan	Far East	Far East	Orange	93	1	Brown	Cream	36.7
G013	PI 153907	Norin No.4	Japan	Far East	Far East	Orange	94	1	Red	Cream	25.6
Norton	Norton	Norton	United States	North America	Far East	Turquoise	396	1	Brown	Cream	23.1
G023	PI 286629	O. 4	China	Far East	Far East	Orange	103	A	Brown	Yellow/Orange	31.1
OHenry	O'Henry	O'Henry	United States	North America	North American-1	Turquoise	397	2	Cream	Cream	21.3
G759	PI 645582	Okinawa Purple	United States	North America	Far East	Turquoise	387	1	Brown	Purple/Cream	33.5
G655	PI 634395	OK-P-10	United States	North America	North American-1	Turquoise	330	A	Brown	Cream	32.4
Orleans	Orleans	Orleans	United States	North America	North American-1	Turquoise	398	2	Red	Yellow/Orange	.
G125	PI 531127	Pampa Culevra	Peru	South America	South American	Green	179	3	Brown	Purple/Orange	40.7
G571	PI 612692	Papilla Mala Hierbra	Peru	South America	Far East	Green	274	1	.	.	.
G115	PI 531117	Paramutai	Peru	South America	South American	Green	171	3	Brown	Yellow/Orange	24.4
G712	PI 634452	Patriot	United States	North America	North American-2-1	Turquoise	371	A	Red	Orange	21.2
Penny	Penny	Penny	United States	North America	North American-2-3	Turquoise	399	4	Red	Orange	29.7
G198	PI 538352	Pepa de Oro	Puerto Rico	Caribbean	South American	Purple	196	3	Cream	Cream	36.2
G659	PI 634399	Picadito	Cuba	Caribbean	Caribbean/Central American	Purple	331	A	Red	White	30.4
G329	PI 566646	Porto Rico	United States	North America	North American-1	Turquoise	234	2	Brown	Yellow/Orange	31.6
G031	PI 315342	Qilin	Philippines	Far East	Far East	Orange	110	1	Brown	White	33.2
G292	PI 564160	Red Abundance	Australia	Australia	Far East	Yellow	219	1	Red	Cream	30.6
G660	PI 634400	Red Resisto	United States	North America	North American-2-2	Turquoise	332	4	Purple/Red	Orange	24.5
G425	PI 585086	Regional de Tehuantepec	Mexico	Central America	Pacific Islands	Blue	241	1	Purple/Red	White	26.6
G073	PI 508520	Self fertile No. 1	China	Far East	Far East	Orange	145	A	Purple/Red	Cream	32.4
G066	PI 508513	Simon-1	Brazil	South America	South American	Green	139	A	Cream	Cream	32.3
G118	PI 531120	SP-7	Peru	South America	South American	Green	174	3	Purple/Red	Purple/Orange	30.6
G662	PI 634402	Sulfur	United States	North America	Pacific Islands	Turquoise	333	1	Purple/Red	Cream	30.8
G189	PI 538343	Sunny	Puerto Rico	Caribbean	North American-1	Purple	189	A	Brown	Yellow/Orange	29.5
G409	PI 585068	Suwon 147	Korea	Far East	North American-1	Orange	235	2	Brown	White	28.1
G014	PI 153909	Taihaku Saitama No. 1	Japan	Far East	Far East	Orange	95	A	Cream	Cream	23.5
G427	PI 585088	Tainung 66	Taiwan	Far East	North American-2-2	Orange	243	A	Red	Orange	24.1
G591	PI 614802	Tainung No 64	Taiwan	Far East	North American-1	Orange	289	A	Brown	Orange	19.7
G583	PI 614794	Taiuani	Tonga	Pacific Islands	Pacific Islands	Red	284	1	Cream	Cream	26.4
G665	PI 634405	TG-3	United States	North America	North American-1	Turquoise	334	A	Cream	White	28.5
G667	PI 634407	TG-5	United States	North America	North American-2-1	Turquoise	335	A	Cream	Cream	26.2
G668	PI 634408	TG-6	United States	North America	North American-1	Turquoise	336	A	Purple/Red	Cream	30.4
G669	PI 634409	TG-7	United States	North America	North American-1	Turquoise	337	A	Brown	Cream	27.4
G295	PI 564771	TIB 4(8)	Nigeria	Africa	African	Pink	221	A	Red	Orange	32
G255	PI 564121	TIB11	Nigeria	Africa	North American-1	Pink	199	2	Red	Orange	27.2
G011	PI 153655	Tinian	Northern Mariana Islands	Pacific Islands	Far East	Red	92	A	Purple/Red	Cream	30.8
G075	PI 508522	TIS 2525	Nigeria	Africa	African	Pink	147	A	Red	Yellow/Orange	31.5
G297	PI 564773	TIS 2534	Nigeria	Africa	North American-1	Pink	222	2	Purple/Red	White	30.4
G586	PI 614797	TIS 70683	Nigeria	Africa	African	Pink	287	A	Red	Cream	28.8
G534	PI 606262	TIS 82/395	Nigeria	Africa	African	Pink	258	A	Cream	Cream	22.3
G532	PI 606260	TIS 83/176	Nigeria	Africa	African	Pink	257	A	Cream	White	33.8
G531	PI 606259	TIS 8409	Nigeria	Africa	African	Pink	256	1	Cream	Cream	23
G576	PI 612697	TIS 8441	Nigeria	Africa	African	Pink	277	A	Cream	White	21.8
G114	PI 531116	TIS 9265	Nigeria	Africa	African	Pink	170	A	Cream	White	25.4
G495	PI 599371	Tongamai	Tonga	Pacific Islands	South American	Red	252	3	Brown	Cream	32.9
G779	PI 667652	Toni	Fiji	Pacific Islands	Pacific Islands	Red	391	1	Cream	Cream	25.6
G193	PI 538347	Toquecita	Solomon Islands	Pacific Islands	Pacific Islands	Red	191	1	Cream	White	25.9
G578	PI 612699	Tsurunash-Genji	Peru	South America	Far East	Green	279	1	Cream	Cream	32.1
G671	PI 634411	Tuskegee-100	United States	North America	North American-1	Turquoise	338	2	Red	Orange	22
G672	PI 634412	V4-29	United States	North America	North American-1	Turquoise	339	A	Red	Orange	26.8
G673	PI 634413	V5-58	United States	North America	North American-2-1	Turquoise	340	A	.	.	.
G124	PI 531126	Vilca, Romero	Peru	South America	South American	Green	178	3	Cream	Cream	28.5
G194	PI 538348	Viola	Solomon Islands	Pacific Islands	Pacific Islands	Red	192	A	Red	Orange	23.6
G689	PI 634429	W-115	United States	North America	North American-1	Turquoise	350	A	Red	Orange	23.6
G690	PI 634430	W-119	United States	North America	North American-2-1	Turquoise	351	A	Red	Orange	28.7
G678	PI 634418	W-13	United States	North America	North American-2-1	Turquoise	343	A	Brown	Yellow/Orange	27.2
G691	PI 634431	W-149	United States	North America	North American-2-1	Turquoise	352	A	Red	Orange	27.5
G692	PI 634432	W-154	United States	North America	North American-2-1	Turquoise	353	A	Purple/Red	Orange	25.8
G694	PI 634434	W-183	United States	North America	North American-2-1	Turquoise	354	A	Purple/Red	Orange	25.2
G695	PI 634435	W-184	United States	North America	North American-2-3	Turquoise	355	A	Red	Orange	25.8
G696	PI 634436	W-189	United States	North America	North American-2-1	Turquoise	356	A	Brown	Orange	24.1
G697	PI 634437	W-203	United States	North America	North American-2-1	Turquoise	357	A	Brown	Cream	30.2
G698	PI 634438	W-208	United States	North America	North American-2-1	Turquoise	358	A	Red	Orange	26.1
G699	PI 634439	W-209	United States	North America	North American-2-1	Turquoise	359	A	Red	Orange	23.9
G700	PI 634440	W-217	United States	North America	North American-2-1	Turquoise	360	A	Red	Orange	23.9
G701	PI 634441	W-220	United States	North America	North American-2-2	Turquoise	361	A	Brown	Orange	27.8
G756	PI 642847	W-220	United States	North America	North American-2-2	Turquoise	384	A	Brown	Orange	19.4
G703	PI 634443	W-226	United States	North America	North American-2-2	Turquoise	362	4	Purple/Red	Orange	24.8
G537	PI 606265	W-228	United States	North America	North American-2-1	Turquoise	261	A	Brown	Orange	20.9
G704	PI 634444	W-230	United States	North America	North American-2-1	Turquoise	363	A	Red	Orange	22.4
G705	PI 634445	W-231	United States	North America	North American-2-2	Turquoise	364	A	Brown	Orange	30.9
G706	PI 634446	W-232	United States	North America	North American-2-1	Turquoise	365	A	Red	Orange	26.3
G707	PI 634447	W-233	United States	North America	North American-2-1	Turquoise	366	A	Brown	Orange	25.2
G708	PI 634448	W-234	United States	North America	North American-2-1	Turquoise	367	A	Red	Orange	21.9
G709	PI 634449	W-235	United States	North America	North American-2-3	Turquoise	368	A	Red	Orange	25.2
G710	PI 634450	W-239	United States	North America	North American-2-1	Turquoise	369	A	Brown	Orange	25.9
G713	PI 634453	W-245	United States	North America	North American-2-1	Turquoise	372	A	Brown	Orange	24.5
G714	PI 634454	W-247	United States	North America	North American-2-1	Turquoise	373	A	Red	Orange	20.3
G715	PI 634455	W-248	United States	North America	North American-2-3	Turquoise	374	A	Brown	Orange	26.4
G716	PI 634456	W-249	United States	North America	North American-2-1	Turquoise	375	A	Red	Orange	21.1
G717	PI 634457	W-250	United States	North America	North American-2-3	Turquoise	376	4	Red	Orange	26.3
G674	PI 634414	W-3	United States	North America	North American-2-1	Turquoise	341	A	Red	Orange	29.7
G768	PI 666136	W-332	United States	North America	North American-2-1	Turquoise	389	A	Red	Cream	37.5
G769	PI 666137	W-333	United States	North America	Far East	Turquoise	390	1	Red	Purple/Cream	29
G682	PI 634422	W-42	United States	North America	North American-2-1	Turquoise	344	A	Purple/Red	Orange	27
G684	PI 634424	W-51-19	United States	North America	North American-2-1	Turquoise	345	A	Red	Yellow/Orange	27.2
G685	PI 634425	W-52	United States	North America	North American-2-1	Turquoise	346	A	Purple/Red	Orange	23
G686	PI 634426	W-57	United States	North America	North American-2-1	Turquoise	347	A	Red	Orange	30.5
G687	PI 634427	W-71	United States	North America	North American-2-1	Turquoise	348	A	.	.	.
G676	PI 634416	W-8	United States	North America	North American-2-1	Turquoise	342	A	Red	Orange	32.6
G688	PI 634428	W-99	United States	North America	North American-2-1	Turquoise	349	A	Red	Orange	25.9
G617	PI 633966	Wagabolige	Uganda	Africa	Far East	Pink	305	1	.	.	.
G277	PI 564144	Wanmun Small	Papua New Guinea	Pacific Islands	Far East	Red	215	1	Red	Cream	26.4
G188	PI 538342	Wart	Puerto Rico	Caribbean	African	Purple	188	A	Red	White	29.2
G055	PI 390482	W-C 1403	Ecuador	South America	South American	Green	129	3	Red	Purple/Orange	35.1
G718	PI 634458	White Bunch	United States	North America	North American-1	Turquoise	377	2	Cream	Cream	29.5
G719	PI 634459	White Jewel	United States	North America	North American-2-1	Turquoise	378	A	Purple/Red	Cream	24.7
G720	PI 634460	White Triumph	United States	North America	North American-1	Turquoise	379	2	Brown	Cream	27.5
G623	PI 633987	WT-108		Far East	Far East	Orange	308	1	.	.	.
G559	PI 612680	WT-262		Far East	North American-1	Orange	264	2	Red	Orange	25.3
G588	PI 614799	WT-314		Far East	Far East	Orange	288	1	Purple/Red	Orange	23.1
G560	PI 612681	WT-320		Far East	Pacific Islands	Orange	265	1	Purple/Red	Cream	33.1
G603	PI 633440	WT-325		Far East	Far East	Orange	297	1	Red	Cream	33.1
G561	PI 612682	WT-335		Far East	Far East	Orange	266	1	Red	White	31.5
G562	PI 612683	WT-399		Far East	Far East	Orange	267	1	.	.	.
G563	PI 612684	WT-532		Far East	Far East	Orange	268	1	Cream	Cream	30.4
G621	PI 633985	WT-57	Taiwan	Far East	Far East	Orange	307	1	.	.	.
G074	PI 508521	Yellow sunflower	China	Far East	South American	Orange	146	A	Brown	Cream	36.5
G061	PI 508507	Yuki-musume	Japan	Far East	South American	Orange	134	A	Cream	Cream	36.9
G585	PI 614796	Zhan 64-285	China	Far East	Far East	Orange	286	1	Brown	Cream	22.8
G538	PI 606266	Zhenghong 3	China	Far East	Far East	Orange	262	A	Brown	Cream	26.2
G058	PI 439749		Mexico	Central America	Caribbean/Central American	Blue	132	1	Cream	White	31
